# Supplementary material
Source: Springer Nature journal article supplement (https://www.springermedizin.de/resource/supplementary/13019_2009_193_MOESM5_ESM.pdf/9638046)

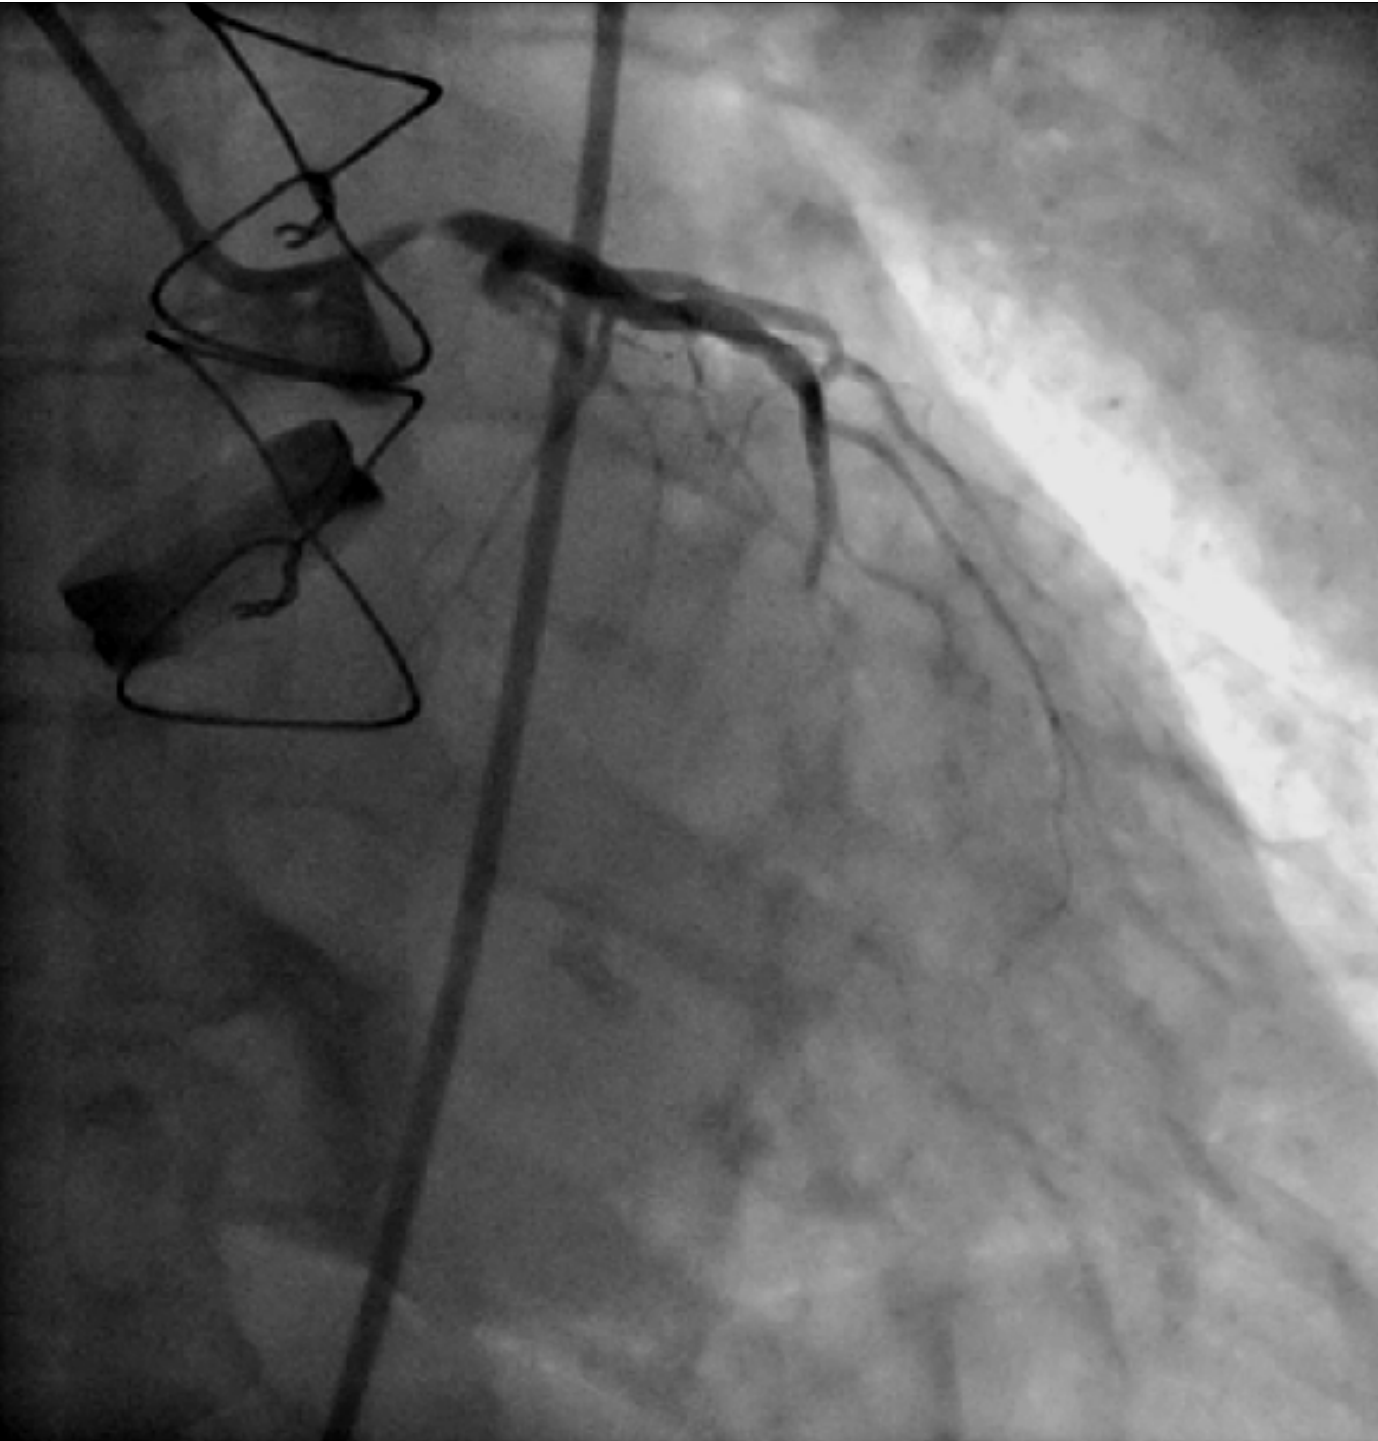

Supplement: MOESM5 [file 9638046]
